# Supplementary material for: Capsular Exopolysaccharides from Two Streptococcus thermophilus Strains Differ in Their Moisture Sorption Behavior
Source: MDPI journal article supplement (doi:10.3390/foods12030596), 2023-01-31
Supplement: s1 [file s1]

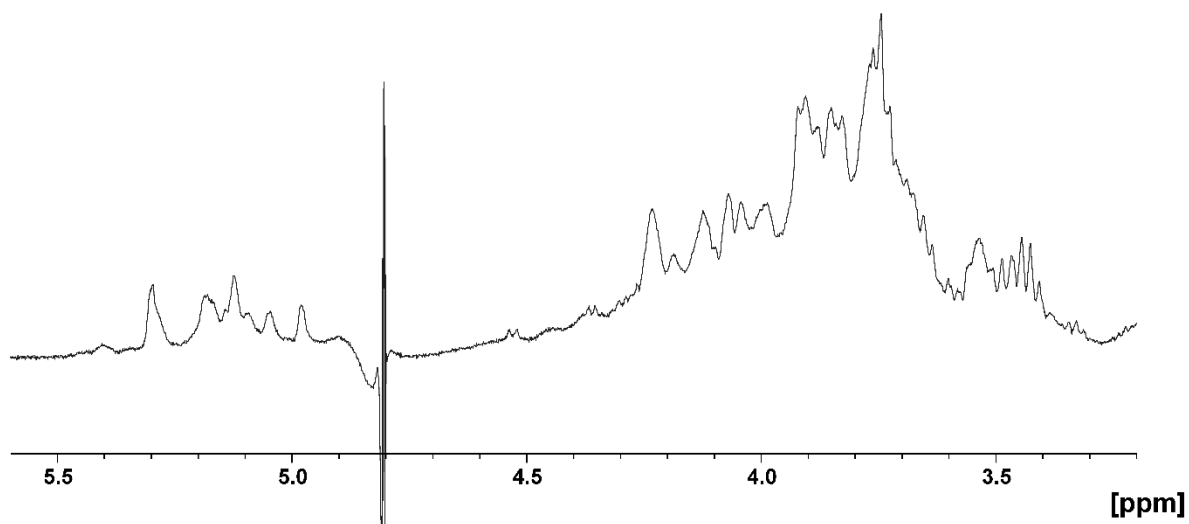

**Figure S1:**  $^1\text{H}$ -NMR spectrum of fEPS from ST-1G.

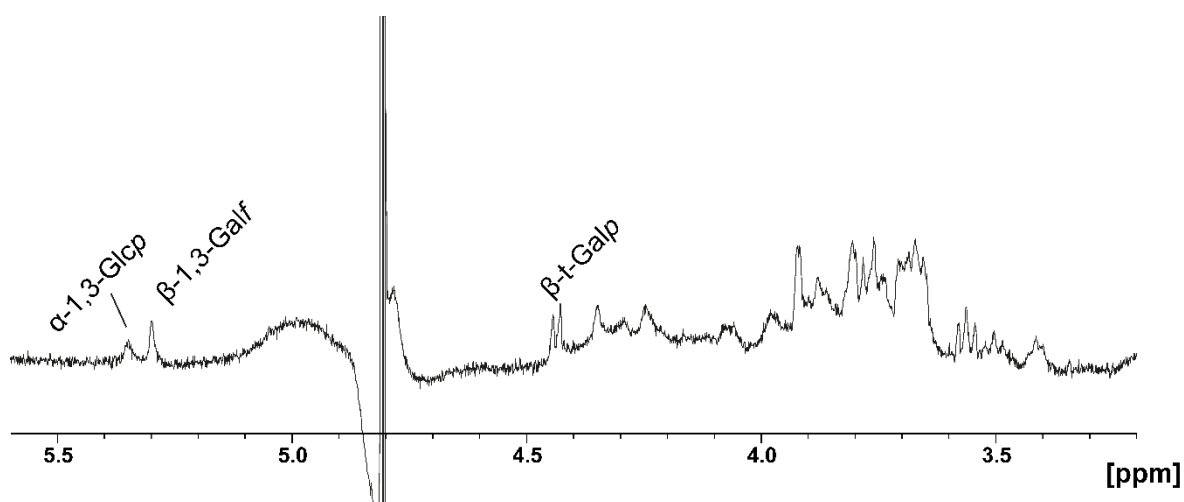

**Figure S2:**  $^1\text{H}$ -NMR spectrum of fEPS from ST-2E. The signal annotation in the anomeric region was derived by comparison with a previously published proton spectrum of *Streptococcus thermophilus* EPS (Nachtigall et al. *Food Hydrocolloids* 2019, 97, 105181).
